# Supplementary material for: The growth in newspaper coverage of tobacco control in China, 2000-2010
Source: BMC Public Health. 2012 Mar 7;12:160. doi: 10.1186/1471-2458-12-160 (PMC3315399; doi:10.1186/1471-2458-12-160)
Supplement: Additional file 1 — The list of continually published newspaper. [file 1471-2458-12-160-S1.XLS]

## Sheet: bzzwm
newspaper name	origin	province	number of article
新华每日电讯(Xinhua Daily Telegraph)	national	Beijing	113
健康报(Health News)	national	Beijing	107
科技日报(Science and Technology Daily)	national	Beijing	74
中国消费者报(China Consumer Journal)	national	Beijing	49
北京日报(Beijing Daily)	local	Beijing	37
人民日报(People's Daily)	national	Beijing	38
中国医药报(Zhongguo Yiyao Bao)	national	Beijing	38
法制日报(Legal Daily)	national	Beijing	33
工人日报(Workers' Daily)	national	Beijing	33
大众科技报(Popular Science News）	national	Beijing	32
光明日报(Guangming Daily)	national	Beijing	31
中国中医药报(China News of Traditional Chinese Medicine)	national	Beijing	31
经理日报(The Manager's Daily)	local	Sichuan	26
医药经济报(Mdicine Economic News)	local	Guangdong	20
人民政协报( People's Political Consultative Conference Newspaper)	national	Beijing	18
中国妇女报(China Wonmen's News)	national	Beijing	18
中华合作时报(Zhong Hua He Zuo Shi Bao	national	Beijing	18
解放日报(Jiefang Daily)	local	Shanghai	17
中国商报(China Business Herald)	national	Beijing	15
中华工商时报(China Business Times)	national	Beijing	15
检察日报(Procuratorial Daily)	national	Beijing	14
文汇报(Wen Hui Bao)	local	Shanghai	14
北京科技报(Science Technology Weekly)	local	Beijing	13
人民日报海外版(People's Daily Overseas Edition)	national	Beijing	13
大众卫生报(Dazhong Weishengbao)	local	Hunan	17
华夏时报(China Times)	national	Beijing	12
中国包装报(China packaging News)	national	Beijing	12
中国教育报(China Education Daily)	national	Beijing	12
经济参考报(Economic Information Daily)	national	Beijing	11
中国财经报(China Finance newspaper)	national	Beijing	10
中国工商报(China Industry and Commerce News)	national	Beijing	10
人民法院报(People's Court Daily)	national	Beijing	9
河南日报(Henan Daily)	local	Henan	8
辽宁日报(Liaoning Daily)	local	Liaoning	8
云南日报(Yunnan Daily)	local	Yunnan	8
中国经济时报(China Economic Times)	national	Beijing	8
中国老年报( China Elderly Journal)	national	Beijing	8
福建日报(Fujian Daily)	local	Fujian	7
山西经济日报(Shanxi Economic Daily)	local	Shanxi	7
四川日报(Sichuan Daily)	local	Sichuan	7
河北日报(Heibei Daily)	local	Hebei	6
吉林日报(Jilin Daily)	local	Jilin	6
农民日报(Farmers' Daily)	national	Beijing	6
山西日报(Shanxi Daily)	local	Shanxi	6
深圳商报(Shenzhen Economic Daily)	local	Guangdong	6
西藏日报(汉)(Tibet Daily)	local	Xizang	6
中国劳动保障报(China Labour and Social Security News)	national	Beijing	6
中国税务报(China Taxation News)	national	Beijing	6
浙江日报(Zhejiang Daily)	local	Zhejiang	5
中国环境报(China Environment News)	national	Beijing	5
中国企业报(China Enterprise News)	national	Beijing	5
中国信息报(China Information News)	national	Beijing	5
重庆日报(Chongqing Daily)	local	Chongqing	5
广东科技报(Guangdong Science And Technology News)	local	Guangdong	4
湖北日报(Hubei Daily)	local	Hubei	4
江西日报(Jiangxi Daily)	local	Jiangxi	4
经济日报(Economic Daily)	national	Beijing	4
上海金融报(Shanghai Financial News)	local	Shanghai	4
上海中医药报(Shanghai Chinese Medicine News)	local	Shanghai	4
中国旅游报(China Tourism News)	national	Beijing	4
中国人口报(China Population News)	national	Beijing	4
中国质量报(China Quality Daily)	national	Beijing	4
民主与法制时报(Democracy and Law Times)	national	Shanghai	3
民族医药报(Minzu Yiyao Bao)	local	Guangxi	3
人民代表报(Renmin Daibiao Bao)	local	Shanxi	3
人民公安报(China Police Daily)	national	Beijing	3
陕西日报(Shanxi Daily)	local	Shanxi	3
消费日报(Consumption Daily)	national	Beijing	3
新华日报(Xinhua Daily)	local	Jiangsu	3
中国经营报(China Business Journal)	national	Beijing	3
安徽日报(Anhui Daily)	local	Anhui	2
华东旅游报(East China Tourism News)	local	Jiangsu	2
江苏科技报(Jiangsu Science And Technology News)	local	Jiangsu	2
西安日报(Xi'an Daily)	local	Shanxi	2
亚太经济时报(Asia Pacific Economic Times)	local	Guangdong	2
医药导报(Herald of Medicine)	local	Chongqing	2
云南政协报(Yunnan Zhengxie Bao)	local	Yunnan	2
中国高新技术产业导报(China High-tech Industry Herald)	national	Beijing	2
中国社会报(China Society News)	national	Beijing	2
中国石化报(China Petrochemical News)	national	Beijing	2
中国石油报(China Petroleum Daily)	national	Beijing	2
中国体育报(China Sports Daily)	national	Beijing	2
兵团日报(汉)(Bingtuan Daily)	local	Sinkiang	1
发展导报(Development Herald)	local	Shanxi	1
福建科技报(FujianTechnology)	local	Fujian	1
广西日报(Guangxi Daily)	local	Guangxi	1
河北科技报(Hebei Kejibao)	local	Hebei	1
湖南日报(Hunan Daily)	local	Hunan	1
计算机世界(China Computerworld)	national	Beijing	1
解放军报(People's Liberation Army Daily)	national	Beijing	1
青海日报(Qinghai Daily)	local	Qinghai	1
上海科技报(Shanghai Science and Technology)	local	Shanghai	1
云南科技报(Yunnan Science and Technology Newspaper)	local	Yunnan	1
证券时报（Security Times)	local	Guangdong	1
中国国门时报(China Inspection and Quarantine times）	national	Beijing	1
中国国土资源报(China Land and Resources News)	national	Beijing	1
中国审计报(Zhongguo Shenji bao	national	Beijing	1
中国文化报(China Culture News)	national	Beijing	1
中国县域经济报(China County Times)	national	Beijing	1
中国新闻出版报(China Press and Publishing Journal)	national	Beijing	1
中国艺术报(China Art News)	national	Beijing	1
中国知识产权报(China Intellectual Property News)	national	Beijing	2
中华建筑报(China Construction News)	national	Beijing	0
安徽经济报	local	Anhui	0
电脑报	local	Chongqing	0
电子报	local	Sichuan	0
东北电力报	local	Liaoning	0
甘肃日报	local	Gansu	0
贵州政协报	local	Guizhou	0
国际商报(International Business Daily)	national	Beijing	0
河北经济日报	local	Hebei	0
河南科技报	local	Henan	0
湖南科技报	local	Hunan	0
华北电力报	local	Beijing	0
华东电力报	local	Shanghai	0
华中电力报	local	Hubei	0
建筑时报	local	Shanghai	0
江苏经济报	local	Jiangsu	0
江苏农业科技报	local	Jiangsu	0
金融时报(Financial Times)	national	Beijing	0
联合时报	local	Shanghai	0
粮油市场报	local	Henan	0
美术报	local	Zhejiang	0
人民邮电(People’s Posts and Telecommunications News )	national	Beijing	0
山东科技报	local	Shandong	0
山西科技报	local	Shanxi	0
陕西科技报	local	Shanxi	0
社会科学报	local	Shanghai	0
世界金属导报	national	Beijing	0
四川政协报	local	Sichuan	0
通信产业报(China Communications Weekly)	national	Beijing	0
通信信息报	local	Fujian	0
团结报	local	Hunan	0
网络世界(China Network World)	national	Beijing	0
文学报	local	Shanghai	0
文艺报(Literature and Art News)	national	Beijing	0
西南电力报	local	Sichuan	0
新疆科技报(汉)	local	Sinkiang	0
新疆日报(汉)	local	Sinkiang	0
学习时报	national	Beijing	0
亚洲中心时报(汉)	local	Sinkiang	0
音乐周报	local	Beijing	0
云南经济日报	local	Yunnan	0
战士报	local	Guangdong	0
中国保险报(Chian Insurance News)	national	Beijing	0
中国测绘报(China S Mapping Report)	national	Beijing	0
中国城乡金融报(China Urban-Rural Financial News)	national	Beijing	0
中国船舶报(China Ship News)	national	Beijing	0
中国档案报(China Archives Information)	national	Beijing	0
中国电力报(China Electric Power News)	national	Beijing	0
中国电脑教育报(China computer education News)	national	Beijing	0
中国电子报(China Electronics News)	national	Beijing	0
中国纺织报(China Textile News)	national	Beijing	0
中国工业报(China Industry News)	national	Beijing	0
中国国防报(Zhongguo Guofangbao	national	Beijing	0
中国海洋报(China Ocean News)	national	Beijing	0
中国航空报(China Aviation News)	national	Beijing	0
中国航天报(China Space News)	national	Beijing	0
中国化工报(China Chemical Industry News)	national	Beijing	0
中国黄金报(China Gold News)	national	Beijing	0
中国计算机报(China Information World)	national	Beijing	0
中国纪检监察报(Zhongguo Jijian Jiancha Bao)	national	Beijing	0
中国建材报(China Building Materials Daily)	national	Beijing	0
中国建设报(China Construction News	national	Beijing	0
中国交通报(China Communications News)	national	Beijing	0
中国教师报(China Teacher)	national	Beijing	0
中国矿业报(China Mining News)	national	Beijing	0
中国绿色时报(China Green Times)	national	Beijing	0
中国能源报(China Energy News)	national	Beijing	0
中国气象报(China Weather Report)	national	Beijing	0
中国食品安全报(China Food Safety News)	national	Beijing	0
中国水利报( China Water Resources News )	national	Beijing	0
中国水运报	local	Hubei	0
中国特产报(China Specialty News)	national	Beijing	0
中国铁道建筑报(China railway Construction News)	national	Beijing	0
中国图书商报（China Book Business Report）	national	Beijing	0
中国畜牧兽医报(China animal husbandry and veterinary report)	national	Beijing	0
中国冶金报(China Metallurgical News)	national	Beijing	0
中国邮政报(China Post News)	national	Beijing	0
中国有色金属报(China Nonferrous Metals News)	national	Beijing	0
中国远洋报	national	Beijing	0
中国证券报（China Securities Journal）	national	Beijing	0
中国组织人事报(Zhongguo zuzhirenshi Bao	national	Beijing	0
中华读书报(Chian Reading Weekly)	national	Beijing	0
组织人事报	local	Shanghai	0
